# Supplementary material for: Disentangling regional trade agreements, trade flows and tobacco affordability in sub-Saharan Africa
Source: Springer Nature journal article supplement (doi:10.1186/s12992-017-0305-x), 2017-11-14

Supplementary Figure 1: Malawi Tobacco Leaf Exports (IN 1000 USD)

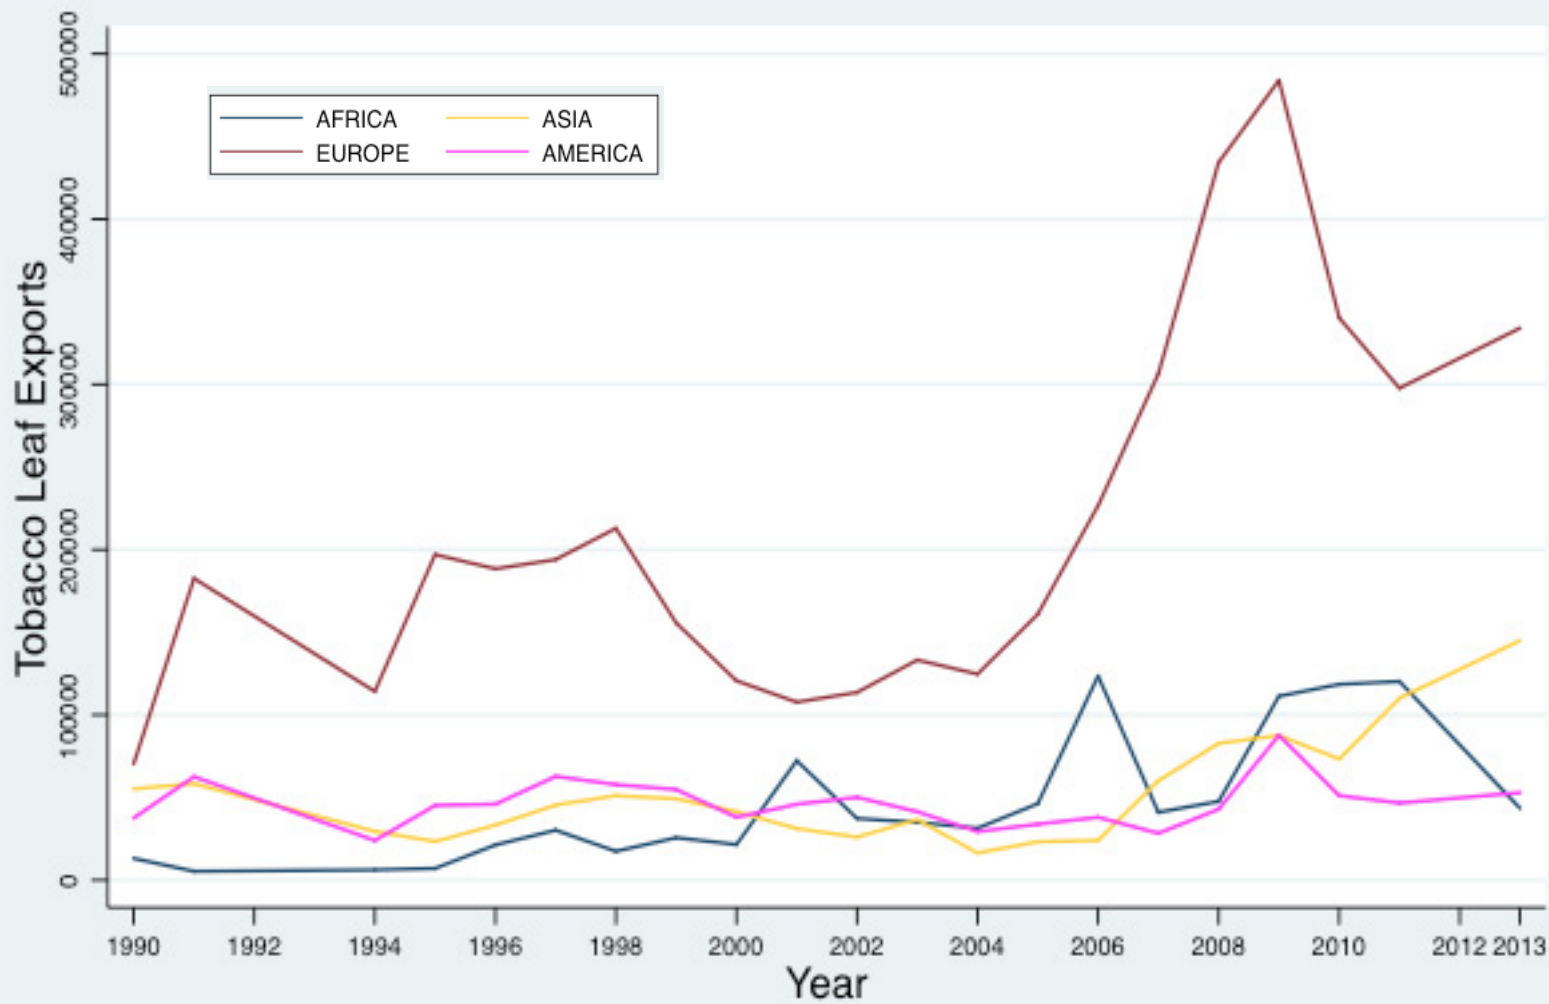

Supplement: MOESM1 [file 15223932]
