# Supplementary material for: Disentangling regional trade agreements, trade flows and tobacco affordability in sub-Saharan Africa
Source: Springer Nature journal article supplement (doi:10.1186/s12992-017-0305-x), 2017-11-14

Supplementary Figure 3: Kenya Manufactured Tobacco Product Exports To Africa (IN 1000USD)

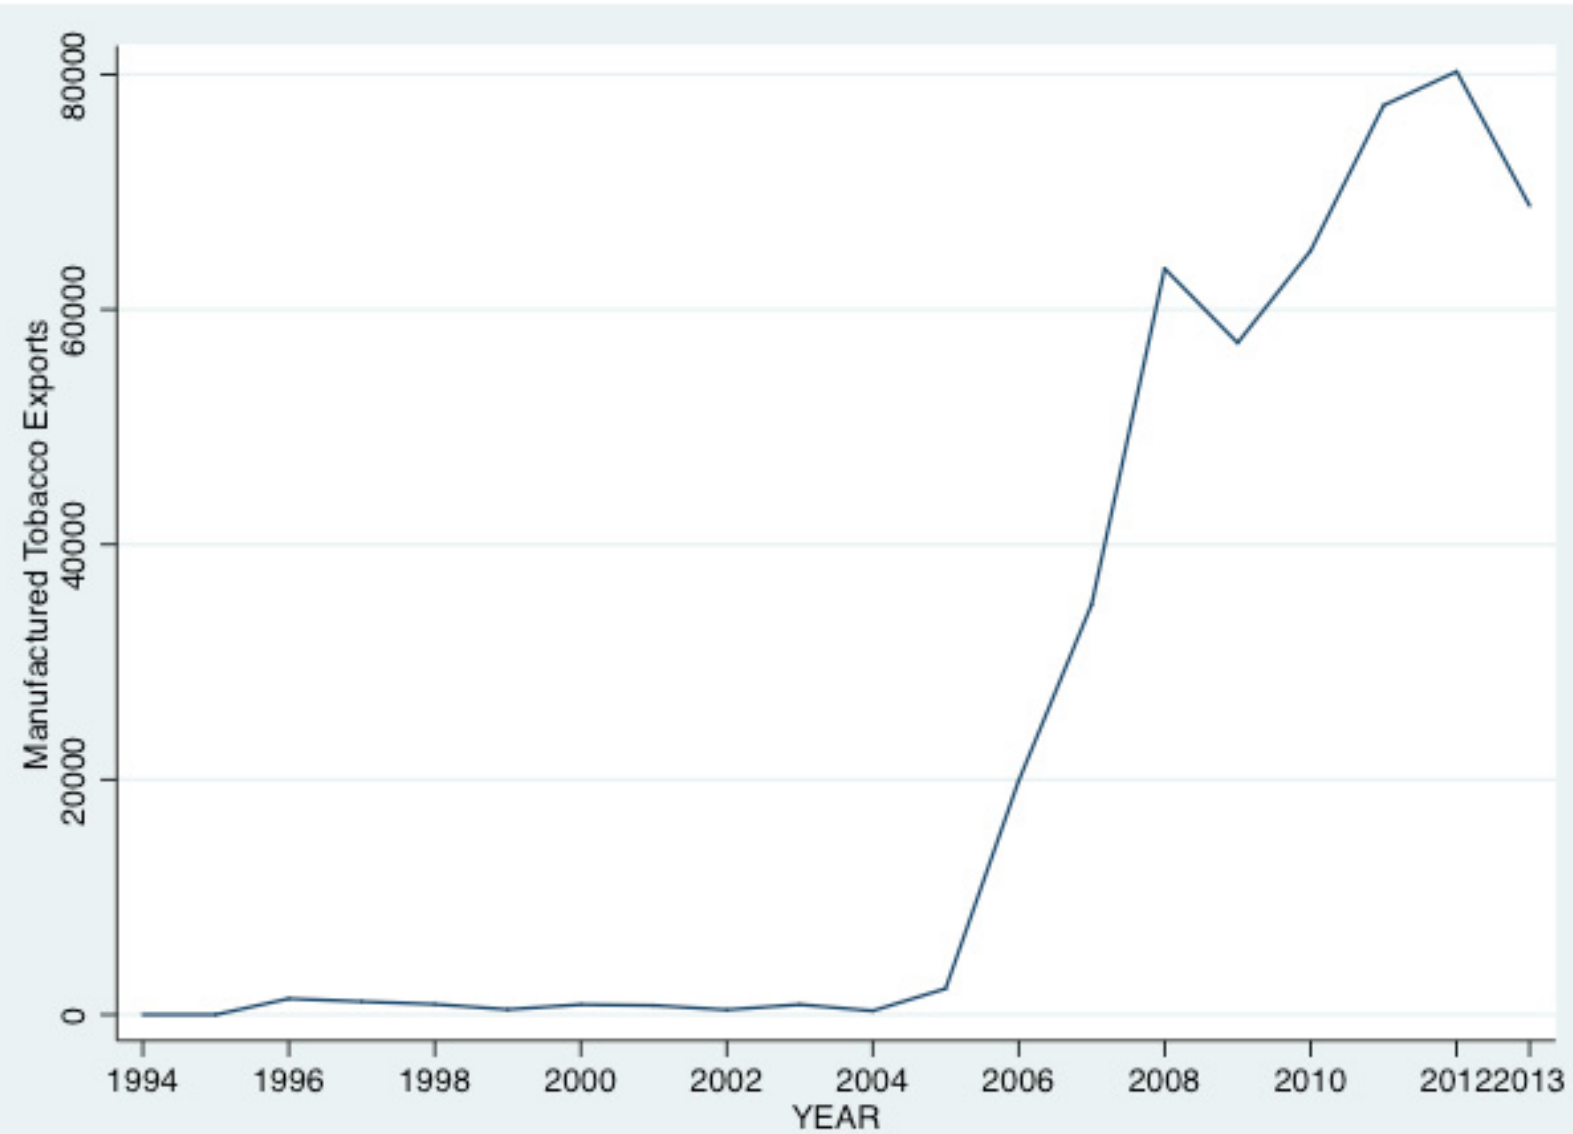

Supplement: MOESM3 [file 15223932]
